# Supplementary material for: Hydrophobic Paper-Based SERS Sensor Using Gold Nanoparticles Arranged on Graphene Oxide Flakes
Source: MDPI journal article supplement (doi:10.3390/s19245471), 2019-12-11
Supplement: s1 [file s1]

Supplementary Materials:

# Hydrophobic Paper-Based SERS Sensor by Gold Nanoparticles Arranged on Graphene Oxide Flakes

Dong-Jin Lee<sup>1</sup> and Dae Yu Kim<sup>1,2\*</sup>

<sup>1</sup> Inha Research Institute for Aerospace Medicine, Inha University, Incheon 22212, Republic of Korea

<sup>2</sup> Department of Electrical Engineering, College of Engineering, Inha University, Incheon 22212, Republic of Korea

\* Correspondence: dyukim@inha.ac.kr; Tel.: +82-032-860-7394

## 1. Contact angle measurements

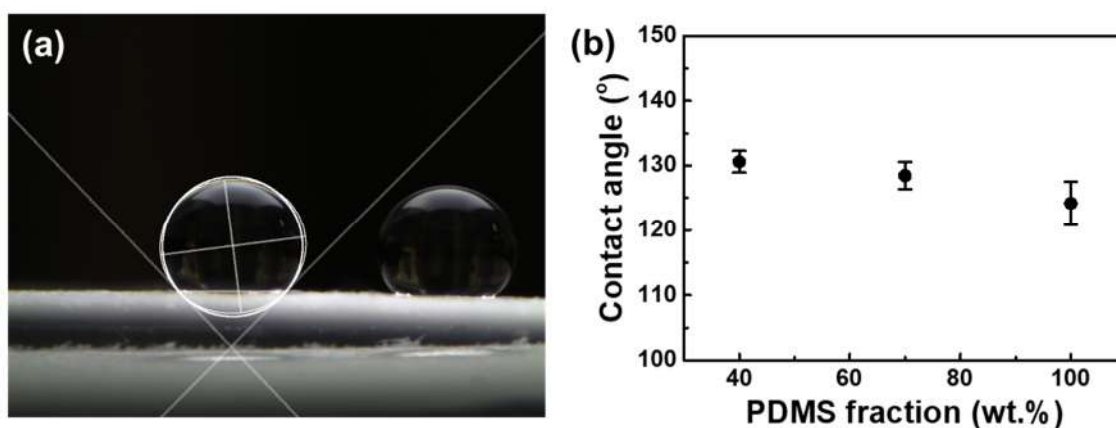

**Figure 1.** (a) The representative shape of water droplets on h-paper substrate. (b) The contact angle measurements of h-paper substrates with different PDMS fraction.

## 2. Au NPs counting

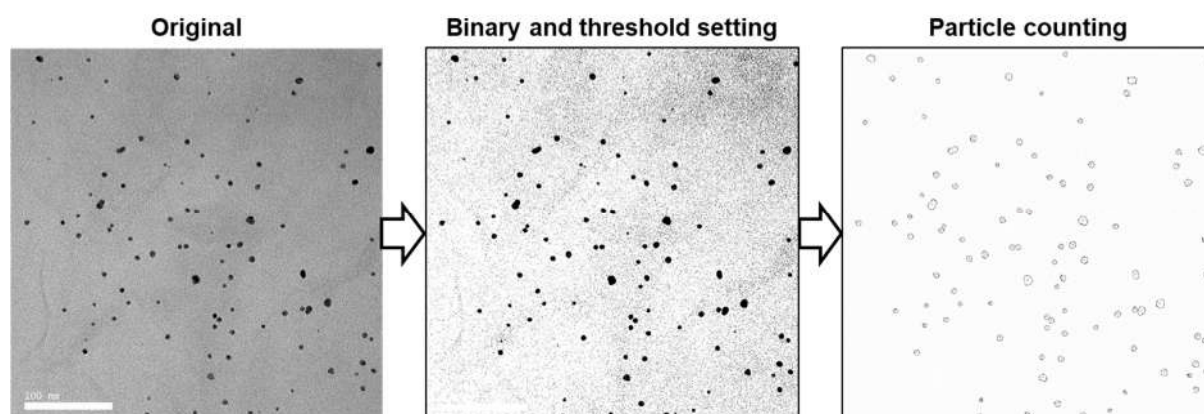

**Figure 2.** Particle counting process. Original image is converted to binary image, and a threshold range is manually set. The Au NPs are automatically counted using ImageJ software.

### 3. Reproducibility

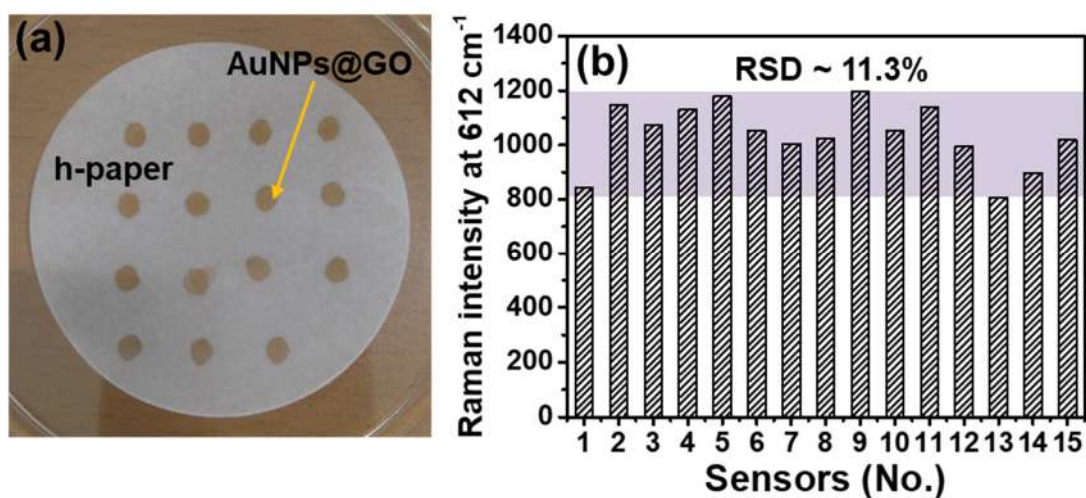

**Figure S1.** (a) Photographic image of the proposed AuNPs@GO/h-paper SERS substrates. (b) Raman intensity at 612 cm<sup>-1</sup> of 10<sup>-3</sup> M R6G measured by 15 Au NPs@GO/h-paper SERS substrates. The relative standard deviation is about 11.3%.

### 4. Reliability

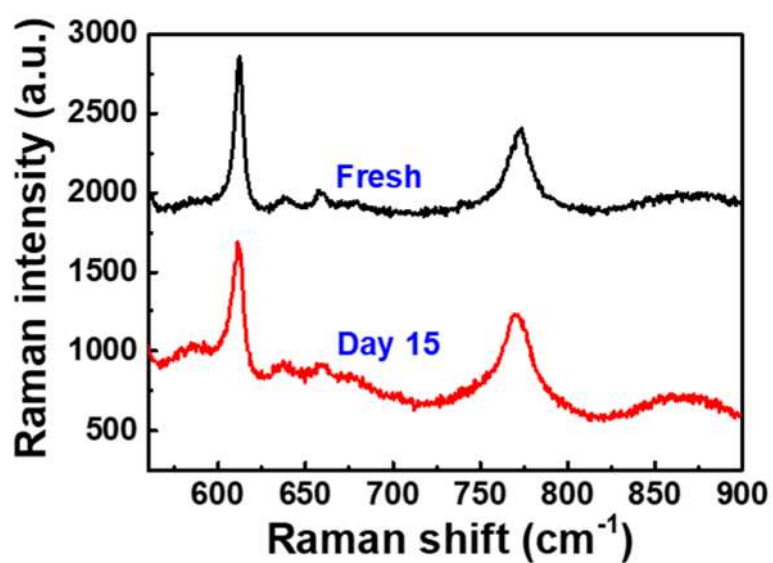

**Figure 4.** Comparison of the Raman intensity of AuNPs@GO/h-paper SERS substrates that kept for 0 and 15 days.

## 5. Raman characteristic peak of R6G molecule

Table 1. Raman characteristic peak of R6G molecule.

| <b>Peak wavenumber (cm<sup>-1</sup>)</b> | <b>Assignment</b>                                                            |
|------------------------------------------|------------------------------------------------------------------------------|
| 613                                      | In plane xanthene ring deformations; Out of plane xanthene ring deformations |
| 775                                      | Out of plane C-H bend; In plane xanthene ring deformations                   |
| 1184                                     | In plane xanthene ring deformations; In plane C-H bend; In plane N-H bend    |
| 1312                                     | In plane xanthene ring breath; In plane N-H bend; CH <sub>2</sub> wag        |
| 1364                                     | Xanthene ring stretch; In plane C-H bend                                     |
| 1512                                     | Xanthene ring stretch; C-N stretch; C-H bend; N-H bend                       |
| 1577                                     | Xanthene ring stretch; in plane N-H bend                                     |
| 1651                                     | Xanthene ring stretch; in plane C-H bend                                     |
